# Supplementary material
Source: PubMed Central journal article supplement (PMC10527069)
Supplement: NIHMS1905854-supplement-Supplemental_Publication_Material.pdf [file NIHMS1905854-supplement-Supplemental_Publication_Material.pdf]

# Supplementary Data

## Cardio-muscular biomarkers in the diagnosis and prognostication of immune checkpoint inhibitor myocarditis

Lorenz H. Lehmann<sup>1\*,§</sup>, Markus B. Heckmann<sup>1\*</sup>, Guillaume Bailly<sup>2</sup>, Daniel Finke<sup>1</sup>, Adrien Procureur<sup>2</sup>, John R. Power<sup>3</sup>, Frederic Stein<sup>1,2</sup>, Marie Bretagne<sup>2</sup>, Stephane Ederhy<sup>4</sup>, Charlotte Fenioux<sup>2</sup>, Omar Hamwy<sup>2</sup>, Elisa Funck-Brentano<sup>5</sup>, Emanuela Romano<sup>6</sup>, Laurence Pieroni<sup>7</sup>, Jan Münster<sup>1</sup>, Yves Allenbach<sup>8</sup>, Céline Anquetil<sup>8</sup>, Sarah Leonard-Louis<sup>9</sup>, Nicolas L. Palaskas<sup>10</sup>, *International ICI-myocarditis Registry*<sup>†</sup>, Salim S. Hayek<sup>11</sup>, Hugo A. Katus<sup>1</sup>, Evangelos Giannitsis<sup>1</sup>, Norbert Frey<sup>1</sup>, Ziya Kaya<sup>1</sup>, Javid Moslehi<sup>12</sup>, Edi Prifti<sup>13</sup>, Joe-Elie Salem<sup>2§</sup>

<sup>1</sup>Department of Cardiology, Angiology, and Pneumology, Heidelberg University Hospital, Heidelberg, Germany; German Centre for Cardiovascular Research (DZHK), Heidelberg/Mannheim partner site, Germany

<sup>2</sup> APHP.Sorbonne, INSERM, Department of Pharmacology, CIC-1901, UNICO-GRECO Cardio-oncology program, Pitié-salpêtrière Hospital, Paris, France

<sup>3</sup> University of California San Diego, San Diego, California

<sup>4</sup> APHP.Sorbonne, INSERM, Department of Cardiology, CIC-1901, UNICO-GRECO Cardio-oncology program, Saint-Antoine Hospital, Paris, France

<sup>5</sup> Hopital Ambroise-Paré, Neuilly Sur Seine

<sup>6</sup> Center for Cancer Immunotherapy, Department of Oncology, PSL Research University, Institut Curie, Paris, France

<sup>7</sup> APHP.Sorbonne, Biochimie- Hormonologie, Hôpital Tenon, Paris, France

<sup>8</sup> APHP.Sorbonne, INSERM, Department of internal medicine, Hôpital Pitié-Salpêtrière, Paris, France

<sup>9</sup> Sorbonne Université, INSERM, Department of Neuropathology, AP-HP, Hôpital Pitié-Salpêtrière, F-75013 Paris, France

<sup>10</sup> Department of Cardiology, The University of Texas MD Anderson Cancer Center, Houston, TX USA

<sup>11</sup> Department of Internal Medicine, Division of Cardiology, University of Michigan, Ann Arbor, MI

<sup>12</sup> Section of Cardio-Oncology & Immunology, Cardiovascular Research Institute, University of California San Francisco, San Francisco, CA, USA

<sup>13</sup> IRD, Sorbonne University, UMMISCO, 32 Avenue Henri Varagnat, F-93143 Bondy, France; Sorbonne Université, INSERM (NutriOmics), Paris, France

† A complete list of the investigators is provided in the Appendix.

\* *these authors contributed equally to the work*

§ **Corresponding Authors:**

PD Dr. med. Lorenz Lehmann, Cardio-Oncology Unit, Department of Cardiology, Angiology, and Pneumology, Heidelberg University Hospital, INF 410, 69120 Heidelberg

Email: [lorenz.lehmann@med.uni-heidelberg.de](mailto:lorenz.lehmann@med.uni-heidelberg.de)

or

Joe-Elie Salem, M.D., Ph.D, Centre d'Investigation Clinique Paris-Est, UF Pharmacologie oncologique et cardiovasculaire – Onco-cardiology, Hôpital Pitié-Salpêtrière, Bâtiment Antonin Gosset, 47-83 Bld de l'hôpital, 75013 Paris, France. Secretariat: +33 1 42 17 85 31, Fax: +33 1 42 17 85 32; Email: [joe-elie.salem@aphp.fr](mailto:joe-elie.salem@aphp.fr)

**Appendix. List of collaborating centers in the international ICI myocarditis registry. Collaborators with over 2 cases entered in the registry are displayed.**

|                                                               |                                        |                     |
|---------------------------------------------------------------|----------------------------------------|---------------------|
| Assistance publique Hôpitaux Universitaires de Marseille Nord | Paris, France                          | Franck Thuny        |
| Barts Health NHS Trust                                        | London, United Kingdom                 | Shanthini Cruz      |
| Beth Israel Deaconess Medical Center                          | Boston, USA                            | Aarti Asnani        |
| Bern University Hospital                                      | Bern, Switzerland                      |                     |
| Cedars Sinai                                                  | Los Angeles, USA                       | Anja Karlstaedt     |
| Centre Hospitalier Universitaire de Nice                      | Nice, France                           | Fanny Rocher        |
| Centre Hospitalier Universitaire de Rennes                    | Rennes, France                         | Elise Paven         |
| Centre hospitalier universitaire Vaudois                      | Lausanne, Switzerland                  | Michel Obeid        |
| Charité – Universitätsmedizin Berlin                          | Berlin, Germany                        |                     |
| Chi Mei Medical Center                                        | Tainan, Taiwan                         | Wei Ting Chan       |
| Clínica Universidad de Navarra                                | Pamplona, Spain                        |                     |
| Dartmouth                                                     | Hitchcock Medical Center, Lebanon, USA | Danette L. Flint    |
| East Carolina University                                      | Greenville, USA                        |                     |
| Eisenhower Medical Center                                     | Rancho Mirage, USA                     |                     |
| Emory University Hospital                                     | Atlanta, USA                           |                     |
| Evangelische Lungenklinik Berlin                              | Berlin, Germany                        |                     |
| General Hospital of Chinese People's Liberation Army          | Beijing, China                         |                     |
| Hôpital Bichat                                                | Paris, France                          | Dimitri Arangalage  |
| Hospices Civils de Lyon                                       | Lyon, France                           | Courand Pierre Yves |
| Hôpital Lariboisière                                          | Paris, France                          | Martin Nicol        |
| Hôpital Rangueil                                              | Toulouse, France                       | Cariou Eve          |
| Hôpital Saint Antoine                                         | Paris, France                          | Stephane Ederhy     |
| Institut Bergonié : Centre Régional de Lutte Contre le Cancer | Bordeaux, France                       |                     |
| International University of Health and Welfare Mita Hospital  | Tokyo, Japan                           | Yuichi Tamura       |
| Japan Community Health Organization Kyushu Hospital           | Kitakyushu, Japan                      |                     |
| Johns Hopkins University                                      | Baltimore, USA                         | Roberta Florido     |
| Kumamoto University                                           | Kumamoto, Japan                        |                     |
| Maine Medical Center                                          | Portland, USA                          | Sanjeev Francis     |
| McMaster University                                           | Hamilton, Canada                       | Darryl Leong        |
| Memorial Sloan Kettering                                      | New York City, USA                     |                     |
| Mitsui Memorial Hospital                                      | Tokyo, Japan                           |                     |
| Monash University                                             | Melbourne, Australia                   |                     |
| Nagoya University Graduate School of Medicine                 | Nagoya, Japan                          |                     |
| Nantes University Hospital                                    | Nantes, France                         | Nicolas Piriou      |
| National Cancer Institute, National Institutes of Health      | Bethesda, USA                          |                     |
| New York University                                           | New York City, USA                     |                     |
| Northwestern Memorial Hospital                                | Chicago, USA                           | Nausheen Akhter     |
| Ohio State University Wexner Medical Center                   | Columbus, USA                          |                     |

|                                                                                     |                                              |                      |
|-------------------------------------------------------------------------------------|----------------------------------------------|----------------------|
| Peter MacCalum Cancer Centre                                                        | Melbourne, Australia                         | Sandhu Shahneen      |
| Rabin Medical Center                                                                | Petah Tikva, Israel                          | Osnat Itzhaki        |
| Rambam Medical Center                                                               | Haifa, Israel                                | Manhal Habib         |
| Rosewell Park                                                                       | Buffalo, USA                                 | Pankit Vachhani      |
| San Raffaele Hospital                                                               | Milan, Italy                                 | Giovanni Peretto     |
| Sorbonne University                                                                 | Paris, France                                | Joe-Elie Salem       |
| St. Luke's International Hospital                                                   | Tokyo, Japan                                 |                      |
| Stanford University                                                                 | Palo Alto, USA                               | Han Zhu              |
| Teikyo University School of Medicine                                                | Tokyo, Japan                                 |                      |
| Tel Aviv Sourasky Medical Center<br>affiliated to the Sackler School of<br>Medicine | Tel Aviv, Israel                             | Michal Laufer Perl   |
|                                                                                     |                                              |                      |
| Tokyo Women's Medical University                                                    | Tokyo, Japan                                 |                      |
| UCSF Medical Center                                                                 | San Francisco, USA                           | Mandar Aras          |
| Université de Caen Basse                                                            | Normandie, Caen, France                      | Joachim Alexandre    |
| University Hospital Basel                                                           | Basel, Switzerland                           |                      |
| University of Alabama                                                               | University Medical Center,<br>Birmingham USA | Carrie Lenneman      |
| University of Michigan                                                              | Ann Arbor, USA                               | Salim Hayek          |
| University of Pittsburgh Medical Center                                             | Pittsburgh, USA                              | Joshua Levenson      |
| University of Texas MD Anderson Cancer<br>Center                                    | Houston, USA                                 | Anita Deswal         |
| University of Texas Southwestern Medical<br>Center                                  | Dallas, USA                                  | Vlad Zaha            |
| University of Tsukuba                                                               | Tsukuba, Japan                               |                      |
| University of Virginia                                                              | Charlottesville, USA                         | Elizabeth M Gaughan  |
| University of Wisconsin                                                             | Madison, USA                                 | Steven Ewer          |
| Vanderbilt University Medical Center                                                | Nashville, USA                               | Douglas Johnson      |
| Yale University School of Medicine                                                  | New Haven, USA                               | Lauren A Baldassarre |

**Supplementary-Table-1. Diagnostic certainty criteria for ICI-myocarditis**

| <b>Hierarchical criteria's accounting for different levels of evidence for ICI-myocarditis</b>                                                                                                                                                                                                                                                                                                                                                                                                                                                                                                                                   |
|----------------------------------------------------------------------------------------------------------------------------------------------------------------------------------------------------------------------------------------------------------------------------------------------------------------------------------------------------------------------------------------------------------------------------------------------------------------------------------------------------------------------------------------------------------------------------------------------------------------------------------|
| <p>For all, other diagnosis/explanations must be excluded (particularly cardiotoxicity of another liable drug used in combination). Overlap between ICI-myocarditis and acute coronary syndrome or venous thromboembolism has been described previously.</p>                                                                                                                                                                                                                                                                                                                                                                     |
| <p><b>Definite myocarditis</b> (any one of the below situations is sufficient)</p> <ul style="list-style-type: none"> <li>- Definite cardiac pathology</li> <li>- Definite CMR + syndrome + (biomarker or ECG or WMA)</li> <li>- WMA + syndrome + biomarker + ECG + negative angiography</li> <li>- Definite muscular pathology + (suggestive/definite CMR or WMA or ECG or suggestive cardiac pathology) + biomarker</li> <li>- Suggestive (muscular or cardiac) pathologies + (suggestive/definite CMR or WMA or ECG) + biomarker + syndrome</li> </ul>                                                                        |
| <p><b>Probable myocarditis</b> (any one of below situations is sufficient)</p> <ul style="list-style-type: none"> <li>- Definite CMR + (biomarker or ECG or WMA) and no syndrome</li> <li>- Suggestive CMR + biomarker + (syndrome or ECG or WMA)</li> <li>- WMA + syndrome + biomarker + ECG and no available angiography</li> <li>- Suggestive muscular pathology + (suggestive CMR or WMA or ECG) + (biomarker or syndrome)</li> <li>- Suggestive cardiac pathology + (biomarker or syndrome or ECG)</li> <li>- Syndrome + biomarker + ECG + negative angiography + no WMA + normal CMR + normal cardiac pathology</li> </ul> |
| <p><b>Possible myocarditis</b> (any one of the below situations)</p> <ul style="list-style-type: none"> <li>- Suggestive CMR + biomarker with no (syndrome or ECG or WMA)</li> <li>- Suggestive/aspecific lesions on muscular pathology + biomarker</li> <li>- Suggestive cardiac pathology</li> <li>- Biomarker + (syndrome or ECG) and no alternative diagnosis*</li> </ul>                                                                                                                                                                                                                                                    |

**Abbreviations:** Biomarker: identification of unknown increase of troponin assay above its 99<sup>th</sup> percentile upper reference limit; CMR: cardiac magnetic resonance imaging (analysis based on T1 & T2 properties of cardiac tissue); ECG: electrocardiogram (12-leads 10 seconds) identifying an unknown abnormality (atrio-ventricular or sinus blocks, bundle branch blocks, ST-T wave changes, micro-voltage, ventricular or supra-ventricular arrhythmias, pathological Q-waves); Syndrome: appearance on ICI of any of the following abnormalities (dyspnea, chest pain, diplopia, ptosis, myalgia, muscular weakness, fatigue, dysphonia, dysphagia, abdominal paradox, syncope, faintness, palpitations, ventricular hyperexcitability on electrocardiographic holter/telemetry (>5% of non-sinus ventricular rhythms), and respiratory muscle involvement probable or definite; WMA: identification of unknown wall motion abnormality or left ventricular ejection fraction<50% by cardiac imaging.

\* Acute coronary syndrome and ICI-myocarditis may co-occur at presentation. ICI-myocarditis should be reassessed after revascularization particularly if this has not led to resolution of alteration in biomarkers, ECG or syndrome or if syndrome is including peripheral muscle involvement not explained by cardiac ischemia (diplopia, ptosis, myalgia, myalgia, muscle weakness, dysphagia, dysphonia).

**Addendum for detailed criteria required depending on modality used for diagnosis of ICI-myocarditis :**

- **Cardiac pathology** (endomyocardial or autopsy samples) :
  - **Definite** : Abnormal lympho-histiocytic inflammatory cells infiltrate (CD3<sup>+</sup> cells  $\geq 7/\text{mm}^2$  or CD68<sup>+</sup> cells  $\geq 4/\text{mm}^2$ ) AND cardiomyocytes necrosis.
  - **Suggestive** (borderline): Abnormal lympho-histiocytic inflammatory cells infiltrate (CD3<sup>+</sup> cells  $\geq 7/\text{mm}^2$  or CD68<sup>+</sup> cells  $\geq 4/\text{mm}^2$ ) WITHOUT cardiomyocytes necrosis.
- **Cardiac magnetic resonance imaging** (analysis based on T1 & T2 properties of cardiac tissue) :
  - **Definite** : Tissue imaging identifying unknown abnormalities in cardiac segments in both T1 (native T1  $\pm$  extracellular volume  $\pm$  presence of late gadolinium enhancement) AND T2 derived maps and sequences.
  - **Suggestive** (borderline): Tissue imaging identifying unknown abnormalities in cardiac segments in either T1 OR T2 derived maps and sequences.
- **Peripheral muscle pathology** (skeletal muscles or autopsy samples) :
  - **Definite** : Abnormal endomysial lympho-histiocytic inflammatory cells infiltrate AND abnormal class 1 human leukocyte antigen overexpression on myocytes AND myocytes necrosis.
  - **Suggestive** (borderline): Abnormal endomysial lympho-histiocytic inflammatory cells infiltrate AND abnormal class 1 human leukocyte antigen overexpression on myocytes WITHOUT myocytes necrosis.
  - **Non-specific lesions**: Abnormal class 1 human leukocyte antigen overexpression on myocytes WITHOUT abnormal endomysial lympho-histiocytic inflammatory cells infiltrate WITHOUT myocytes necrosis.

**Supplementary-Table-2. Technical aspects of the different assays used to determine cardiac troponins and CK circulating levels**

| <i>Analyzer, Assay (manufacturer)</i>              | <i>n/N, % of tested samples</i> | <i>Assay Range in ng/L</i> | <i>Limit of detection (LoD) in ng/L</i> | <i>Limit of blank (LoB) in ng/L</i> | <i>10% coefficient of variation (<sup>10%</sup>CV) in ng/L</i> | <i>99<sup>th</sup> percentile normal cut-off values in ng/L</i> |
|----------------------------------------------------|---------------------------------|----------------------------|-----------------------------------------|-------------------------------------|----------------------------------------------------------------|-----------------------------------------------------------------|
| <b>Cardiac Troponin-T (cTnT)</b>                   |                                 |                            |                                         |                                     |                                                                |                                                                 |
| Cobas Elecsys Troponin T hs (Roche)*               | 1751/1751 (100%)                | 3 – 10,000                 | 3                                       | 2.5                                 | 13                                                             | 14                                                              |
| <b>Cardiac Troponin-I (cTnI)</b>                   |                                 |                            |                                         |                                     |                                                                |                                                                 |
| Cobas Elecsys Troponin I (Roche)*                  | 40/920 (4%)                     | 160 – 25,000               | 160                                     | 100                                 | 300                                                            | 160                                                             |
| Atellica IM High-Sensitivity Troponin I (Siemens)* | 512/920 (56%)                   | 2.5 – 25,000               | 1.6                                     | 0.5                                 | <6.0                                                           | 34.11 (F) 53.48 (M)                                             |
| Architect STAT High Sensitive Troponin-I (Abbott)* | 101/920 (11%)                   | 10 – 50,000                | 1.1 – 1.9                               | 0.7 – 1.3                           | 4.0 – 10.0                                                     | 15.6 (F) 34.2 (M)                                               |
| ADVIA Centaur TnI-Ultra (Siemens)                  | 267/920 (29%)                   | 6 – 50,000                 | 3                                       | NA                                  | 30                                                             | 40                                                              |
| <i>Analyzer, Assay (manufacturer)</i>              | <i>n/N, % of tested samples</i> | <i>Assay Range in U/L</i>  | <i>Limit of detection (LoD) in U/L</i>  | <i>Limit of blank (LoB) in U/L</i>  | <i>10% coefficient of variation (<sup>10%</sup>CV) in ng/L</i> | <i>95<sup>th</sup> percentile normal cut-off values in U/L</i>  |
| <b>Creatine Kinase (CK)</b>                        |                                 |                            |                                         |                                     |                                                                |                                                                 |
| Atellica CH Creatine Kinase (CK L) (Siemens)       | 22/1191 (2%)                    | 15 – 1,300                 | 6                                       | 1                                   |                                                                | 34 – 145 (F)<br>46 – 171 (M)                                    |
| Cobas Creatine Kinase (CK) (Roche)                 | 820/1191 (69%)                  | 7 – 2,000                  | 7                                       | 7                                   |                                                                | 26 – 192 (F)<br>39 – 308 (M)                                    |
| Dimension Vista Creatine Kinase (CKI) (Siemens)    | 2/1191 (<1%)                    | 7 – 1,000                  | 7                                       | 2                                   |                                                                | 26 – 192 (F)<br>39 – 308 (M)                                    |
| ADVIA Chemistry XPT (Siemens)                      | 340/1191 (29%)                  | 15 – 1,300                 | 6                                       | 3                                   |                                                                | 34 – 145 (F)<br>46 – 171 (M)                                    |
| ARCHITECT Creatine Kinase (CK) (Abbott)            | 7/1191 (<1%)                    | 7 – 4,267                  | 5.1                                     | NA                                  |                                                                | 29 – 168 (F)<br>30 – 200 (M)                                    |

**Abbreviations:** CV, coefficient of variation; CI, confidence interval; F, female; LoB, Limit of Blank; LoD, Limit of Detection; LoQ, Limit of Quantitation; M, male; NA, not available.

\* high-sensitive assays (hs)

**Supplementary-Table-3. Detailed results of non-linear mixed effects models.** In model-A, we studied if the ratio of cTnT/URL over cTnI/URL (as a proxy of their divergence, n=761 timepoints) was influenced by the following fixed effects variables (time-period after admission for ICI-myocarditis, inclusion center, age and sex), integrating the following random effects (patients' identity, and cTnI assay types). In model-B, we added to model-A the presence of detectable IgG or IgM anti-cTnI antibodies as a fixed effect (n=493 time-points). Inclusion center was dropped for this latter model because IgG/IgM anti-cTnI antibodies status was only available in the French cohort. A serum sample identifying detectable IgG or IgM anti-cTnI (at least >1/40 for each) was considered positive for a 10days time period, except if plasmapheresis was performed within this time-period.

| <b>Model-A, Random Effects</b>                      |             |                |                  |
|-----------------------------------------------------|-------------|----------------|------------------|
| - Patients identity (n=55) - cTnI assay types (n=4) |             |                |                  |
| <b>Fixed effects</b>                                |             |                |                  |
|                                                     | Estimate    | Standard-error | p-value          |
| <i>Intercept</i>                                    | -51.4       | 28.7           | 0.11             |
| <i>Age (years)</i>                                  | <b>0.7</b>  | <b>0.3</b>     | <b>0.02</b>      |
| <i>Sex (Male)</i>                                   | <b>16.3</b> | <b>8.0</b>     | <b>0.05</b>      |
| <i>Center (France)</i>                              | 5.9         | 21.8           | 0.82             |
| <i>Days after diagnosis (4-7)</i>                   | -6.3        | 6.5            | 0.34             |
| <i>Days after diagnosis (8-14)</i>                  | 2.8         | 6.8            | 0.63             |
| <i>Days after diagnosis (15-30)</i>                 | <b>45.9</b> | <b>5.9</b>     | <b>&lt;0.001</b> |
| <i>Days after diagnosis (31-90)</i>                 | <b>21.4</b> | <b>5.9</b>     | <b>&lt;0.001</b> |
| <i>Days after diagnosis (91-180)</i>                | 6.5         | 7.0            | 0.35             |
| <i>Days after diagnosis (181-360)</i>               | 1.1         | 7.9            | 0.89             |
| <b>Model-B, Random Effects</b>                      |             |                |                  |
| - Patients identity (n=29) - cTnI assay types (n=2) |             |                |                  |
| <b>Fixed effects</b>                                |             |                |                  |
|                                                     | Estimate    | Standard-error | p-value          |
| <i>Intercept</i>                                    | -48.7       | 31.0           | 0.14             |
| <i>Age (years)</i>                                  | <b>0.9</b>  | <b>0.4</b>     | <b>0.02</b>      |
| <i>Sex (Male)</i>                                   | <b>27.5</b> | <b>12.1</b>    | <b>0.03</b>      |
| <i>IgG anti-cTnI (detectable)</i>                   | -9.6        | 9.2            | 0.30             |
| <i>IgM anti-cTnI (detectable)</i>                   | -1.1        | 7.6            | 0.89             |
| <i>Days after diagnosis (4-7)</i>                   | -17.1       | 11.6           | 0.14             |
| <i>Days after diagnosis (8-14)</i>                  | -10.4       | 9.9            | 0.29             |
| <i>Days after diagnosis (15-30)</i>                 | <b>40.6</b> | <b>9.1</b>     | <b>&lt;0.001</b> |
| <i>Days after diagnosis (31-90)</i>                 | 15.5        | 9.5            | 0.10             |
| <i>Days after diagnosis (91-180)</i>                | -3.2        | 11.0           | 0.77             |
| <i>Days after diagnosis (181-360)</i>               | -11.6       | 12.1           | 0.34             |

Abbreviations: cTnI: cardiac troponin-I; cTnT: cardiac troponin-T; Ig: immunoglobulin ; ICI: immune-checkpoint inhibitor ; URL: upper reference limit (99<sup>th</sup> percentile)

**Supplementary-Table-4. Detailed results of non-linear mixed effects models by subgroups of patients with a same cTnI assay performed.** We studied if the ratio of cTnT/URL over cTnI/URL (as a proxy of their divergence) was influenced by the following fixed effects variables (time-period after admission for ICI-myocarditis, age and sex), integrating the patients' identity as a random effect for Architect STAT High sensitive Troponin-I (ABBOTT, n=37 timepoints; A), Atellica IM TnIH (SIEMENS, n= 458 timepoints; B) and TnI-Ultra/ADVIA Centaur XPT (SIEMENS, n=265; C).

| <b>Model-A, Random Effects</b>        |              |                |                  |
|---------------------------------------|--------------|----------------|------------------|
| - Patients identity (n=13)            |              |                |                  |
| <b>Fixed effects</b>                  |              |                |                  |
|                                       | Estimate     | Standard-error | p-value          |
| <i>Intercept</i>                      | <b>-48.2</b> | <b>10.1</b>    | <b>&lt;0.001</b> |
| <i>Age (years)</i>                    | <b>0.7</b>   | <b>0.2</b>     | <b>&lt;0.001</b> |
| <i>Sex (Male)</i>                     | <b>18.9</b>  | <b>4.9</b>     | <b>&lt;0.001</b> |
| <i>Days after diagnosis (4-7)</i>     | 11.4         | 14.9           | 0.45             |
| <i>Days after diagnosis (8-14)</i>    | 0.5          | 10.3           | 0.96             |
| <i>Days after diagnosis (15-30)</i>   | 10.5         | 8.1            | 0.21             |
| <i>Days after diagnosis (31-90)</i>   | <b>17.1</b>  | <b>7.9</b>     | <b>0.04</b>      |
| <i>Days after diagnosis (91-180)</i>  | -3.2         | 9.9            | 0.75             |
| <i>Days after diagnosis (181-360)</i> | -7.0         | 15.8           | 0.66             |
| <b>Model-B, Random Effects</b>        |              |                |                  |
| - Patients identity (n=29)            |              |                |                  |
| <b>Fixed effects</b>                  |              |                |                  |
|                                       | Estimate     | Standard-error | p-value          |
| <i>Intercept</i>                      | -48.2        | 30.6           | 0.13             |
| <i>Age (years)</i>                    | <b>1.0</b>   | <b>0.4</b>     | <b>0.03</b>      |
| <i>Sex (Male)</i>                     | <b>27.4</b>  | <b>13.0</b>    | <b>0.05</b>      |
| <i>Days after diagnosis (4-7)</i>     | -19.2        | 12.2           | 0.12             |
| <i>Days after diagnosis (8-14)</i>    | -9.3         | 10.5           | 0.38             |
| <i>Days after diagnosis (15-30)</i>   | <b>45.6</b>  | <b>10.0</b>    | <b>&lt;0.001</b> |
| <i>Days after diagnosis (31-90)</i>   | 15.5         | 9.9            | 0.12             |
| <i>Days after diagnosis (91-180)</i>  | 0.2          | 11.6           | 0.99             |
| <i>Days after diagnosis (181-360)</i> | -8.6         | 12.5           | 0.49             |
| <b>Model-C, Random Effects</b>        |              |                |                  |
| - Patients identity (n=26)            |              |                |                  |
| <b>Fixed effects</b>                  |              |                |                  |
|                                       | Estimate     | Standard-error | p-value          |
| <i>Intercept</i>                      | 29.3         | 33.7           | 0.39             |
| <i>Age (years)</i>                    | -0.3         | 0.4            | 0.48             |
| <i>Sex (Male)</i>                     | -3.7         | 8.3            | 0.66             |
| <i>Days after diagnosis (4-7)</i>     | 3.4          | 5.2            | 0.51             |
| <i>Days after diagnosis (8-14)</i>    | <b>14.9</b>  | <b>5.1</b>     | <b>0.004</b>     |
| <i>Days after diagnosis (15-30)</i>   | <b>46.9</b>  | <b>5.5</b>     | <b>&lt;0.001</b> |
| <i>Days after diagnosis (31-90)</i>   | <b>23.5</b>  | <b>5.6</b>     | <b>&lt;0.001</b> |
| <i>Days after diagnosis (91-180)</i>  | 12.2         | 6.8            | 0.07             |
| <i>Days after diagnosis (181-360)</i> | <b>-11.6</b> | <b>12.1</b>    | <b>0.05</b>      |

Abbreviations: cTnI: cardiac troponin-I; cTnT: cardiac troponin-T; Ig: immunoglobulin ; ICI: immune-checkpoint inhibitor ; URL: upper reference limit (99<sup>th</sup> percentile)



**Supplementary-Figure-1. Correlation (rho; spearman’s test) between concomitant cTnT and cTnI values as a function of cTnI assay used.** There was no significant difference in the correlations observed between the different cTnI assay used and cTnT as obtained with the Fisher’s z test for independent correlations ( $p=0.58$ ,  $p=0.68$ ,  $p=0.76$ , respectively for Architect vs. Atellica, Architect vs. Centaur and Atellica vs. Centaur). *URL stands for 99<sup>th</sup> percentile upper reference limit. Cobas Elecsys® Troponin I assay is not shown because only one value was concomitantly available with cTnT evaluation.*

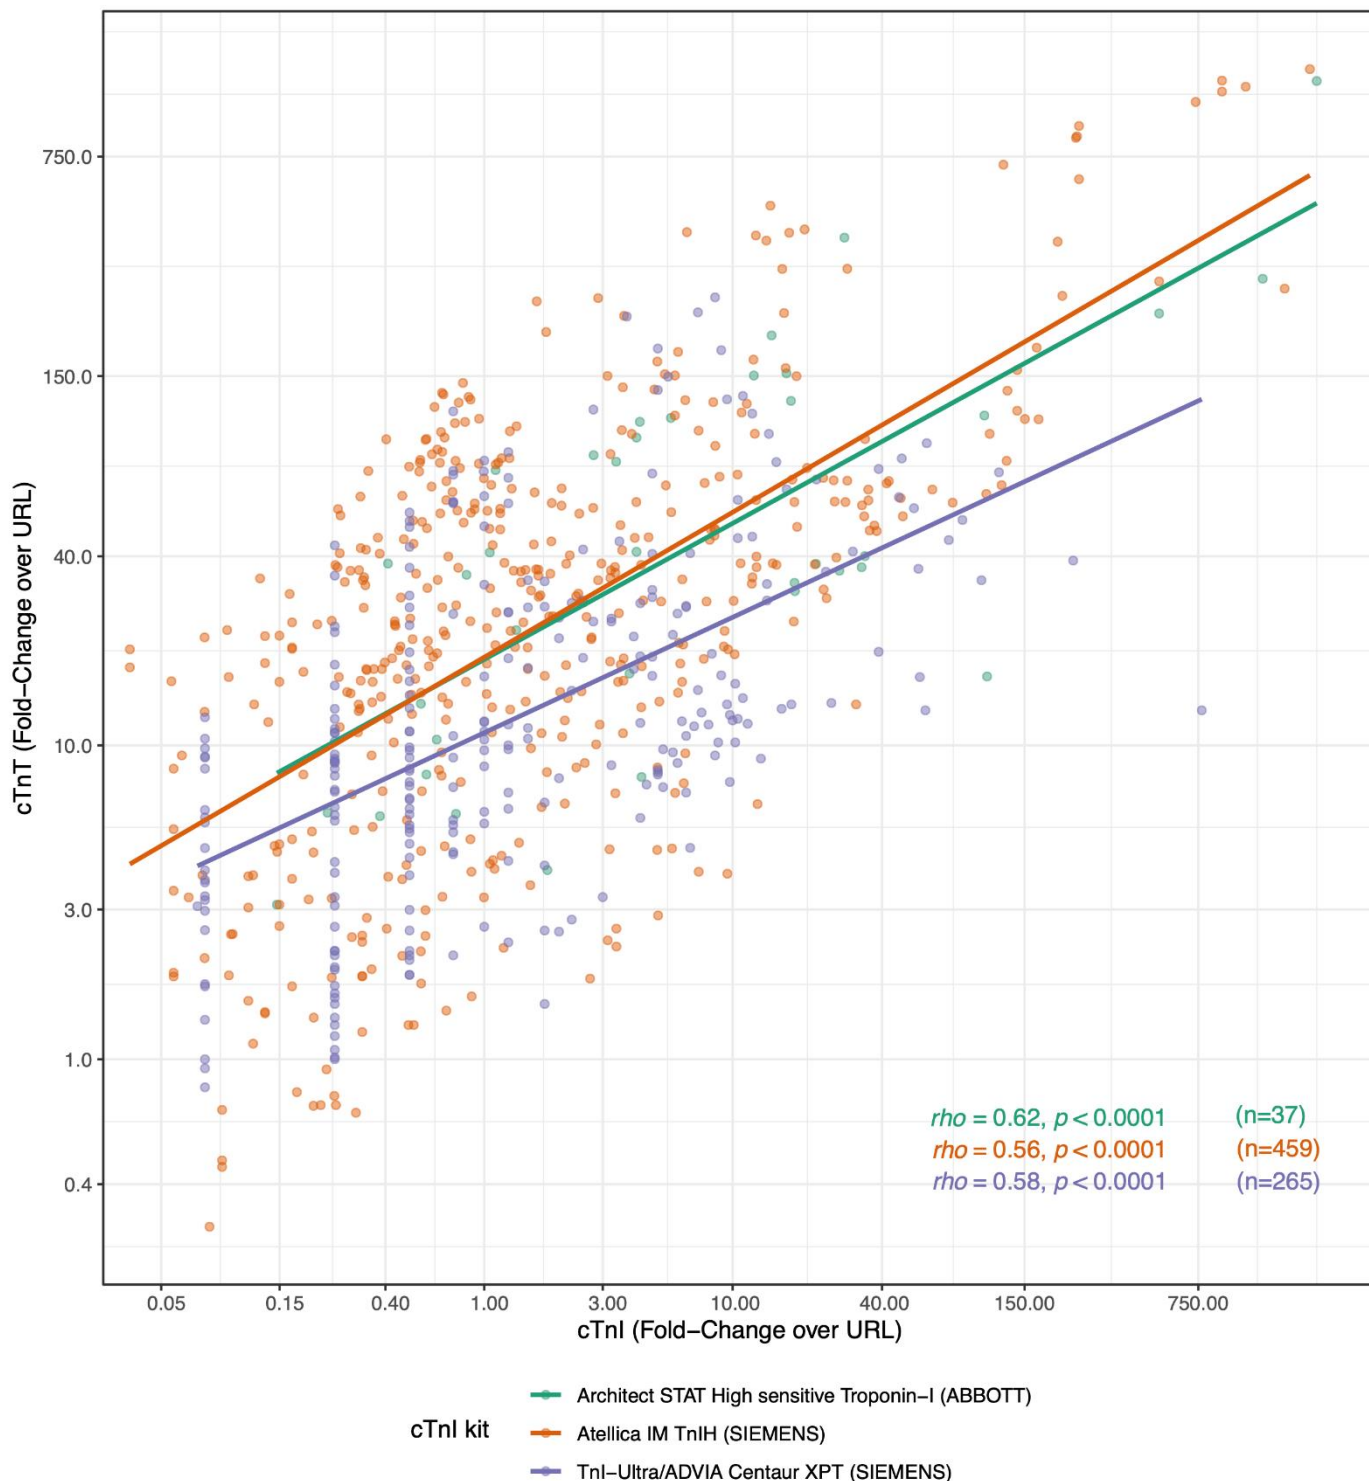

**Supplementary-Figure-2. LOESS (Locally Estimated Scatterplot Smoothing) of the mean (and standard-error) of the ratio of cTnT/URL over cTnI /URL over time after initial admission for ICI-myocarditis in a one-year follow-up as a function of sex (A) and age median (B)**

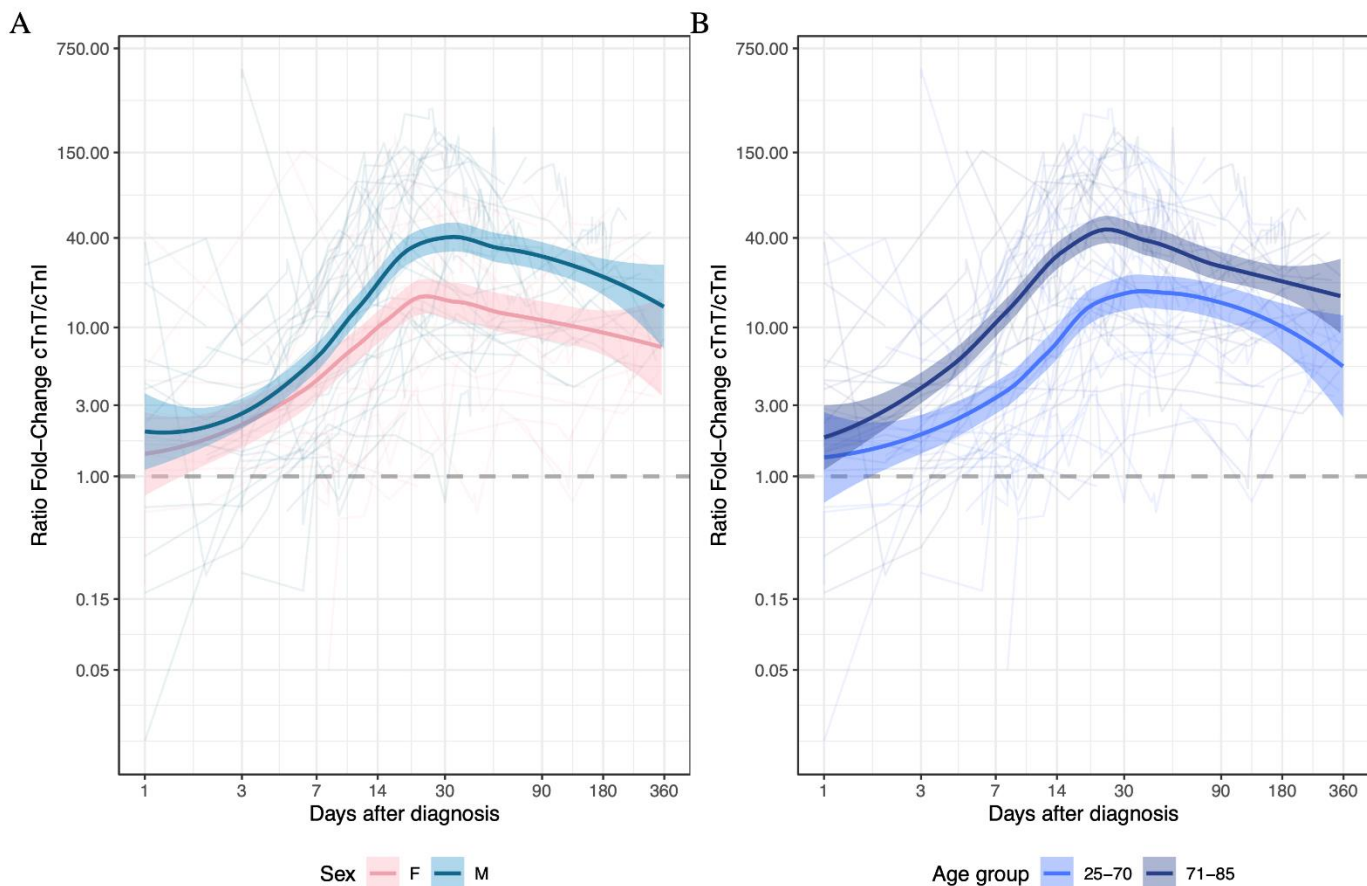

**Abbreviations:** cTnI: cardiac troponin-I; cTnT: cardiac troponin-T; F: female ; ICI: immune-checkpoint inhibitor ; M: male; URL: upper reference limit (99<sup>th</sup> percentile)

**Supplementary-Figure-3. Cardiac biomarkers as predictors of non-MACE related death vs. overall mortality:** (A) Non-MACE related death, and overall mortality (B) over one-year follow-up after admission for ICI-myocarditis as a function of cTnT/URL value above and below 32 (n=57) using maximal cTnT values within 72h of admission.

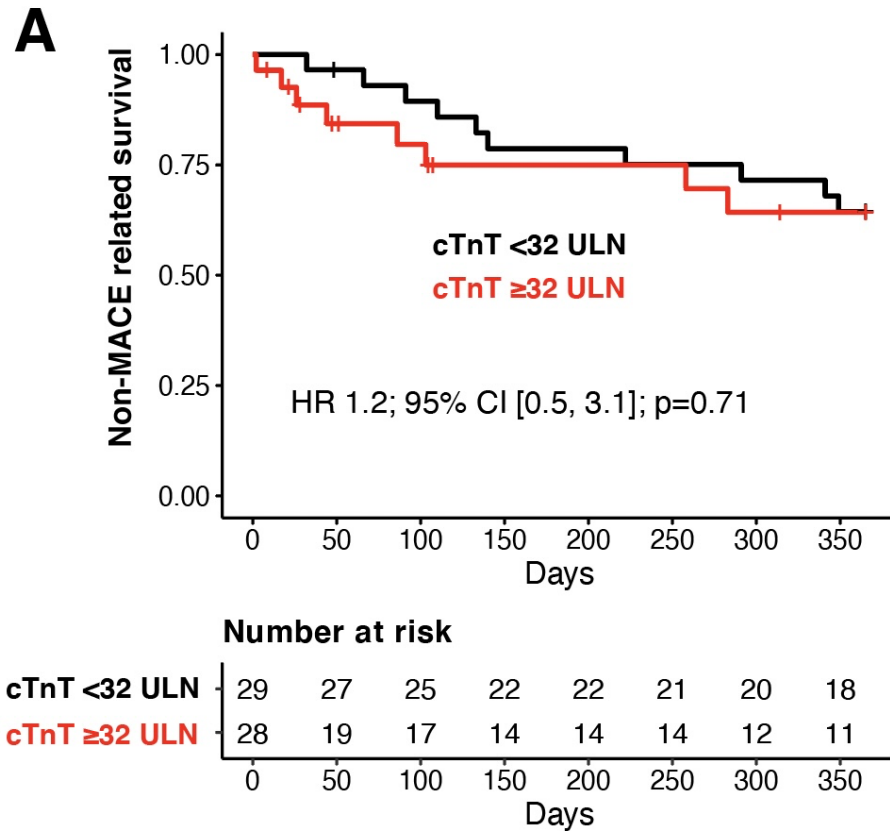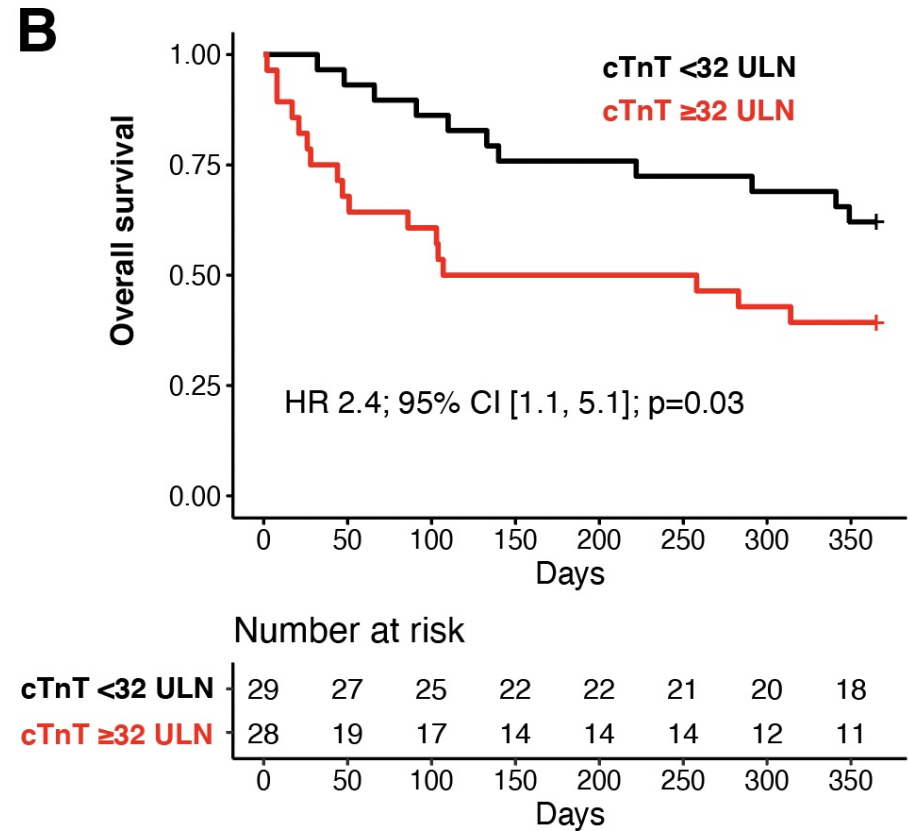

*Abbreviations:* MACE, major adverse cardio-myotoxic event; URL, upper reference limit being upper 99<sup>th</sup> percentile of normal values for troponins; HR, hazard ratio; CI, confidence interval; Tn, Troponin as indicated. CI, 95% confidence interval

**Supplementary-Figure-4. ICI-myocarditis cases and their biomarker evolution over time as a function of MACE incidence or not in the overall cohort (A); and at the time of MACE in patients having developed a MACE (B).** URL (upper reference limits) of cardiac troponin T (cTnT), cardiac troponin I (cTnI), and creatine kinase (CK) are represented by a grey dotted line. The stars represent the peak value of biomarkers (A). MACE is represented by dotted vertical lines in B (see icon legends for types of MACE).

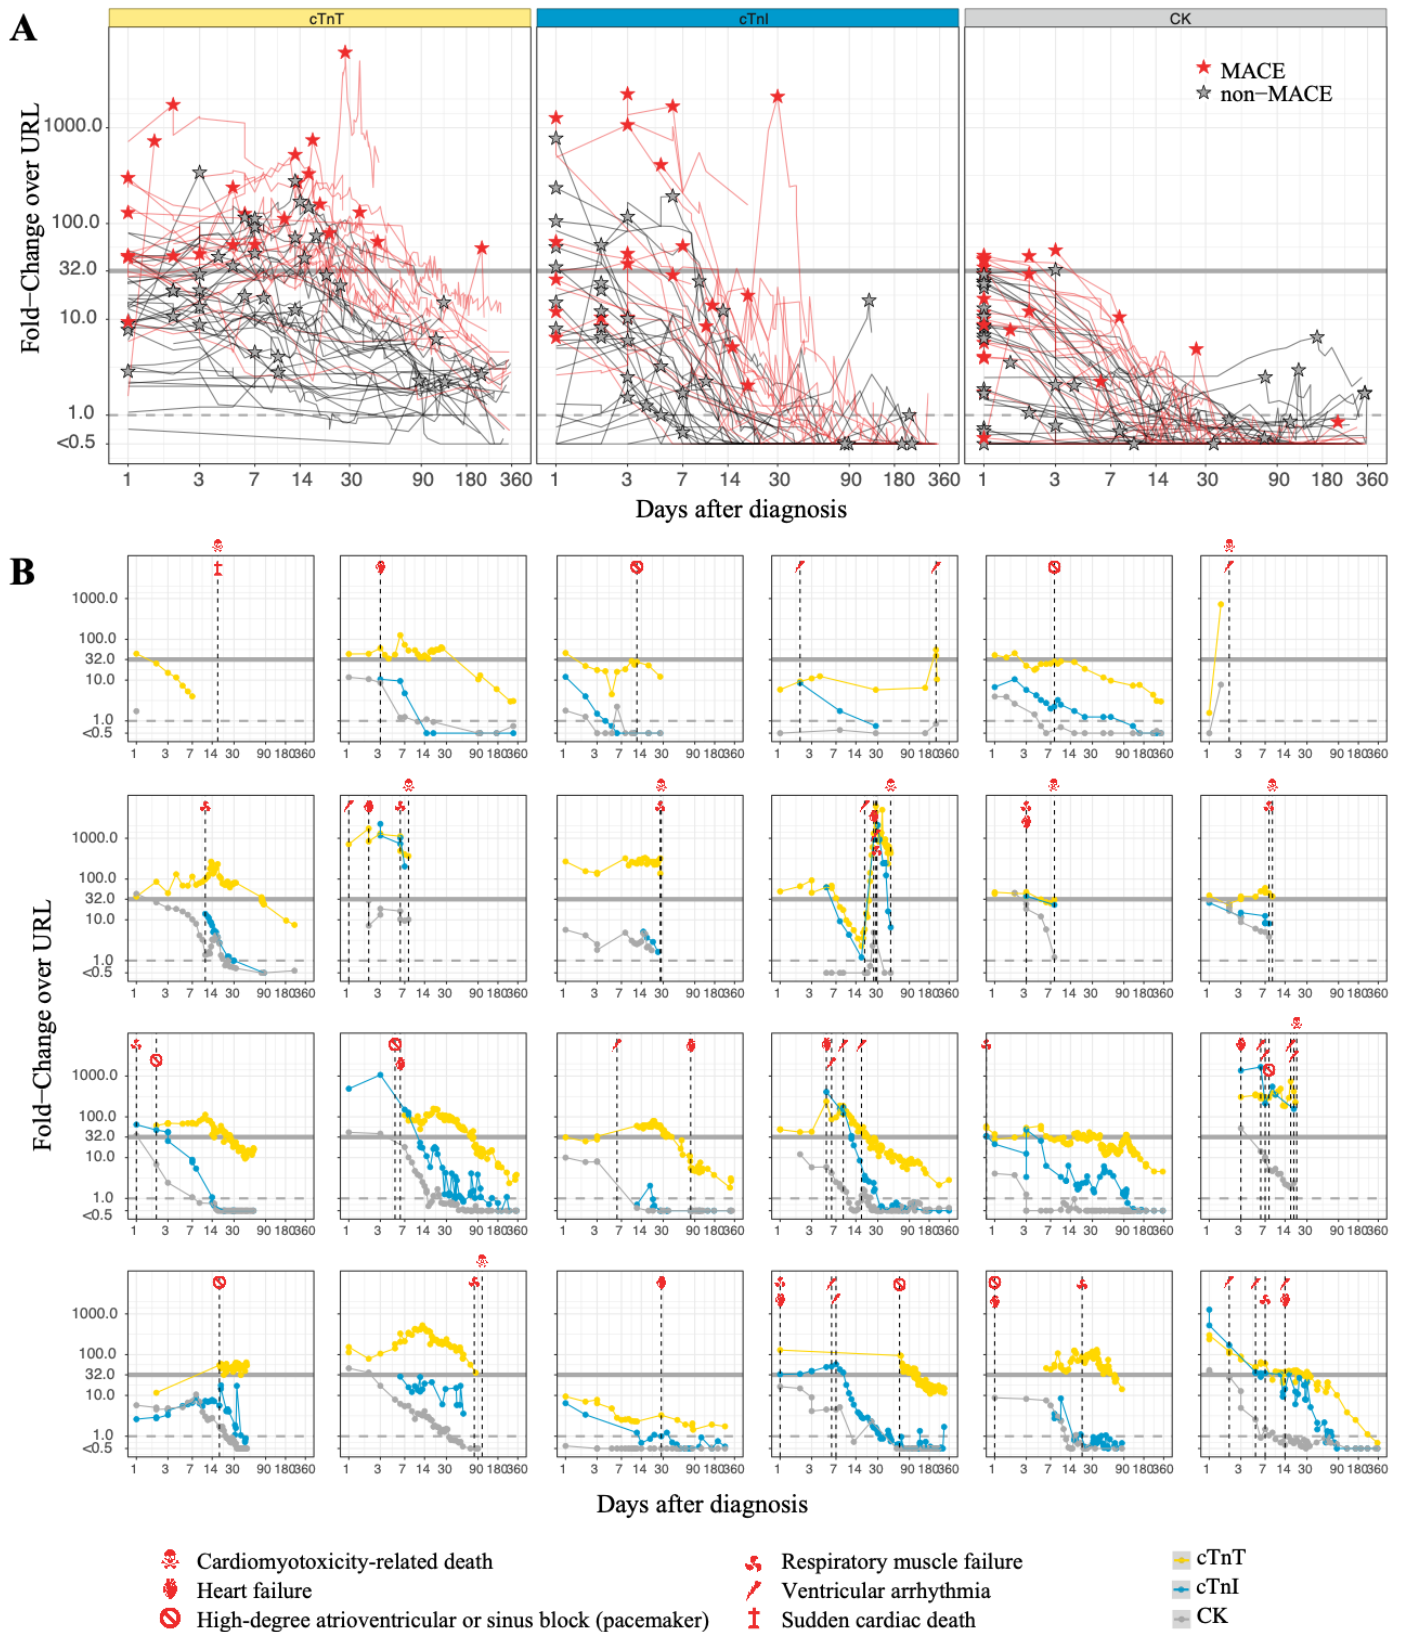

**Abbreviations:** MACE, major adverse cardio-myotoxic event; URL: upper reference limit being upper 99<sup>th</sup> percentile of normal values for troponin and 95<sup>th</sup> percentile of normal values for creatine kinase
